# Supplementary material for: Dyslexia Impairs Speech Recognition but Can Spare Phonological Competence
Source: PLOS journal article supplement (doi:10.1371/journal.pone.0044875), 2012-09-19

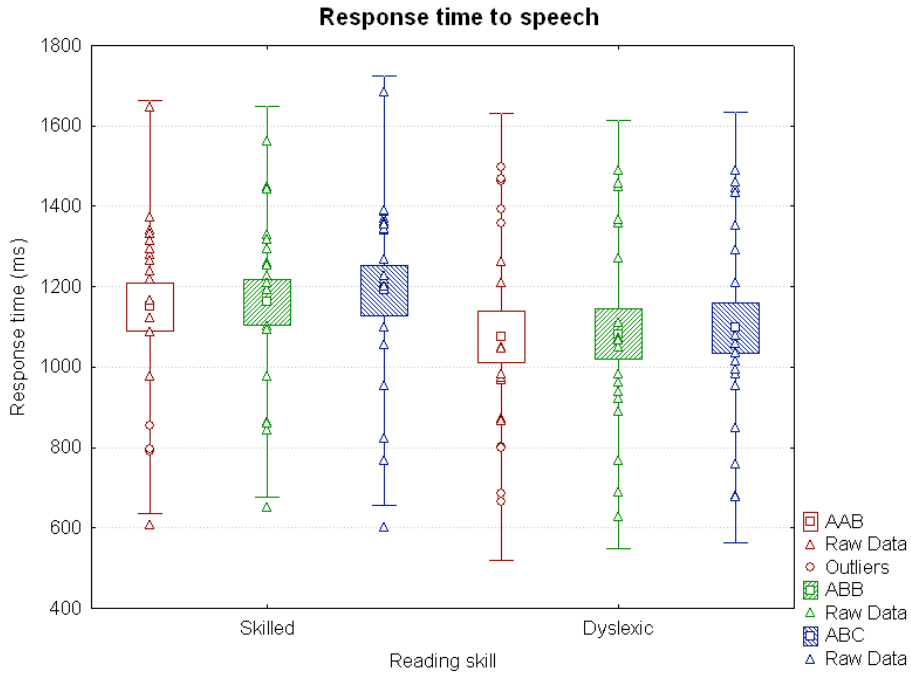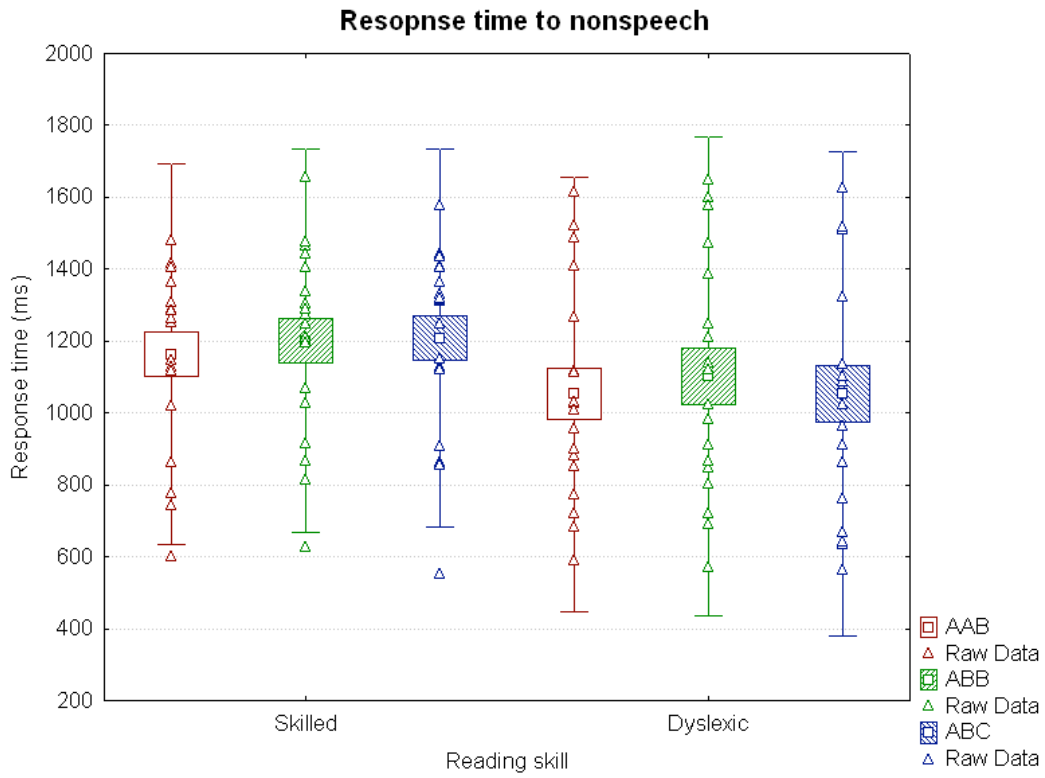

Supplement: S4 (10.1371/journal.pone.0044875.s004) [file journal.pone.0044875.s004]
